# Supplementary material for: Effect of calcination temperature on the microstructure of vanadium nitride/nitrogen-doped graphene nanocomposites as anode materials in electrochemical capacitors
Source: Royal Society of Chemistry journal article supplement (doi:10.1039/c8qi01071d), 2018-11-14
Supplement: c8qi01071d1.pdf [file c8qi01071d1.pdf]

## Supporting Information

### **Effect of calcination temperature on microstructure of vanadium nitride/nitrogen-doped graphene nanocomposite as an anode material in electrochemical capacitors**

Jinghua Liu,<sup>a</sup> Fengfan Li,<sup>a</sup> Weiwei Liu<sup>a</sup> and Xin Li<sup>\*a,b</sup>

<sup>a</sup>, MIIT Key Laboratory of Critical Materials Technology for New Energy Conversion and Storage, School of Chemistry and Chemical Engineering, Harbin Institute of Technology, Harbin 150090, China. E-mail: [lixin@hit.edu.cn](mailto:lixin@hit.edu.cn)

<sup>b</sup>, State Key Lab of Urban Water Resource and Environment, Harbin Institute of Technology, Harbin 150090, China

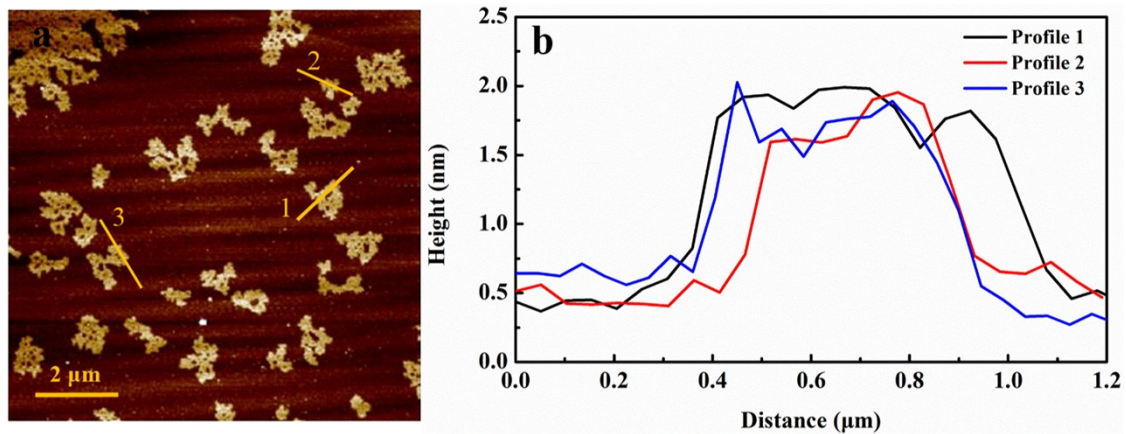

**Fig. S1** (a) AFM image of N-Gr, (b) AFM height profiles of N-Gr. The position of the profiles are marked as yellow lines in (a).

AFM was used to investigate the layer thickness of N-Gr. As shown in Fig. S1, AFM image (Fig. S1a) proves the presence of layer structure of carbon nanosheets on a mica substrate. The depth profiles (Fig. S1b) demonstrate that the heights of carbon nanosheets are in the range of 1-2 nm, indicating that the carbon nanosheets can be seen as graphene with three or four layers of carbon lattice [Ref. 1-2].

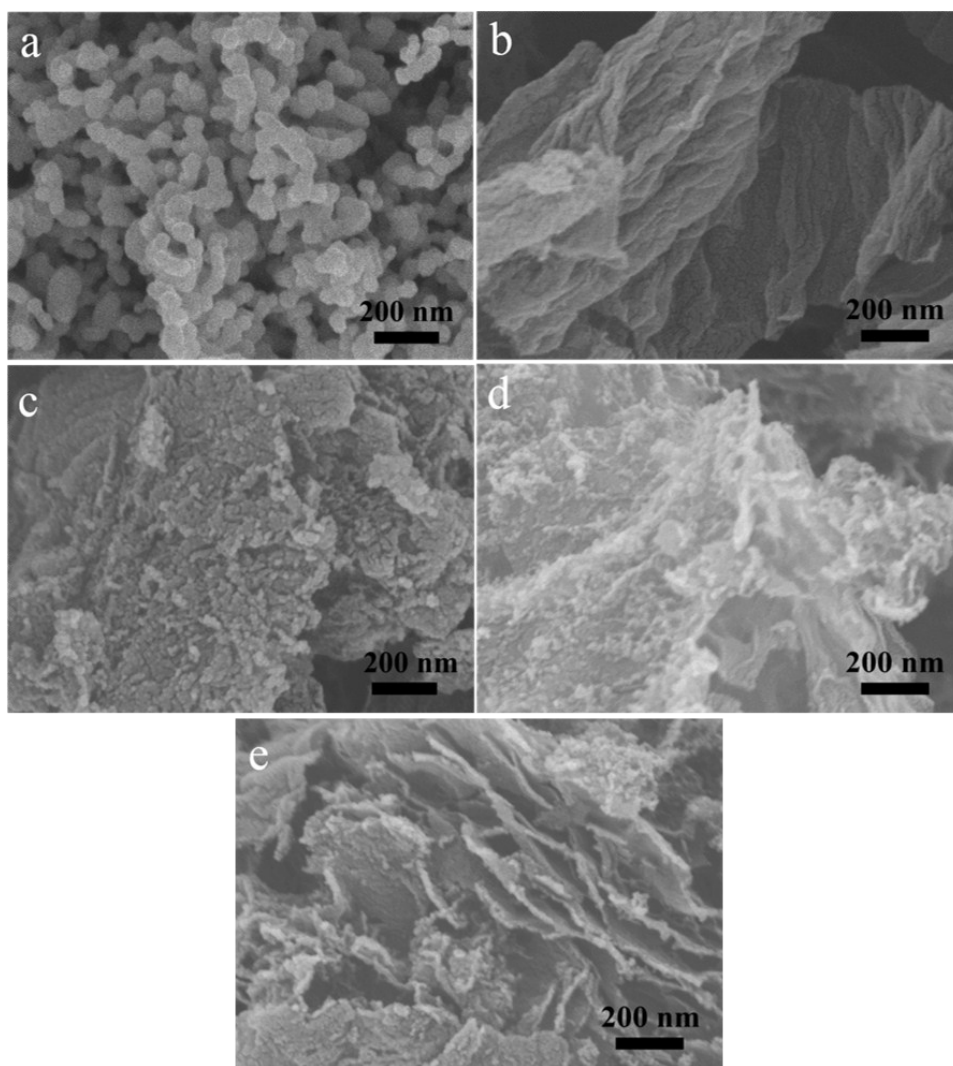

**Fig. S2** SEM images of (a) VN, (b) N-Gr, (c) VN/N-Gr-700, (d) VN/N-Gr-800, (e) VN/N-Gr-900

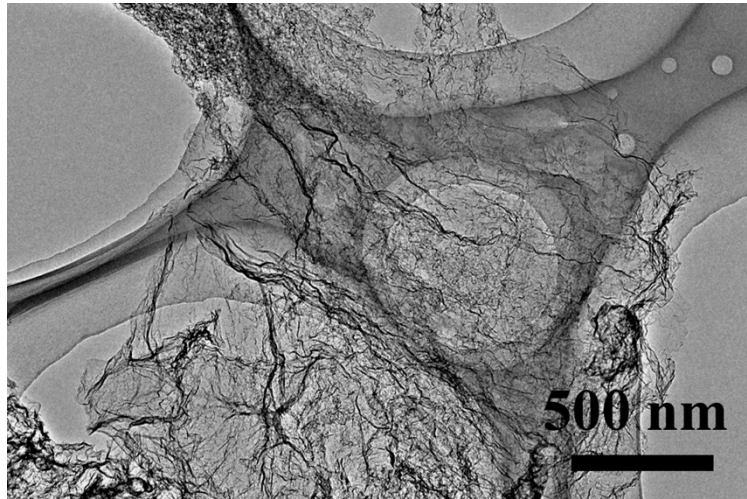

**Fig. S3** TEM image of N-Gr

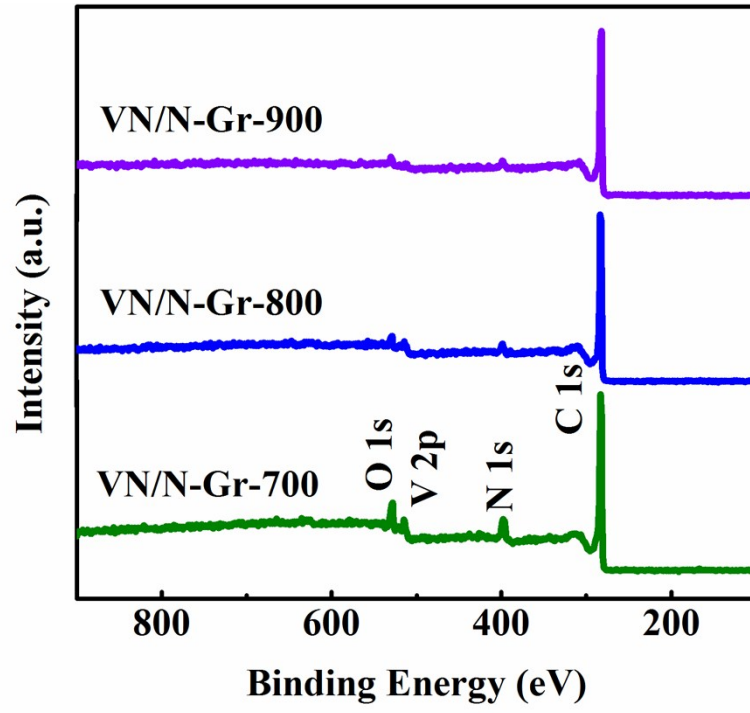

Fig. S4 XPS survey spectra of VN/N-Gr-700, VN/N-Gr-800, and VN/N-Gr-900.

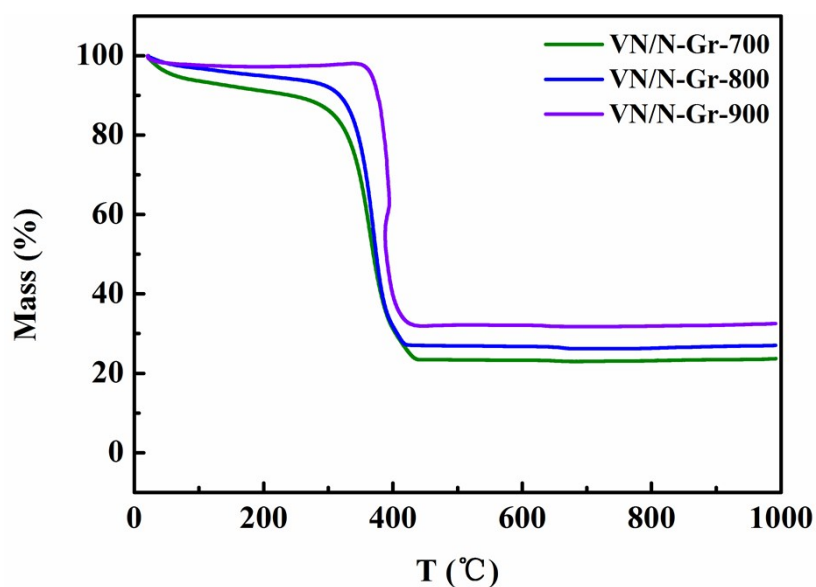

Fig. S5 TGA curves of VN/N-Gr-700, VN/N-Gr-800, and VN/N-Gr-900 in air.

The TGA curves of VN/N-Gr-700, VN/N-Gr-800, and VN/N-Gr-900 were conducted in air atmosphere from room temperature to 1000 °C with a heating rate of 5 °C min<sup>-1</sup>. As shown in Fig. S5, before 300°C, all curves firstly descend due to the decomposition of oxygenous and nitrogenous groups. After that, the mass change is caused by the duplicate effect between the transformation of carbon into CO<sub>2</sub> and VN into V<sub>2</sub>O<sub>5</sub>. In the next step, the mass loss takes place owing to the combustion of carbon [Ref. 3-4]. Calculated from the TGA curves, the content of VN in VN/N-Gr-700, VN/N-Gr-800, and VN/N-Gr-900 is 16.9 wt%, 19.3 wt%, and 23.2 wt%, respectively.

**Table S1** Summary of the recently reported vanadium-based/carbon hybrids and their electrochemical performances in three-electrode configurations.

| Materials                             | Potential range (V) | Electrolytes | Capacitance                                      |
|---------------------------------------|---------------------|--------------|--------------------------------------------------|
| VN/C [Ref. 3]                         | -1.2 - 0            | 2 M KOH      | 195.7 F g <sup>-1</sup> at 1 A g <sup>-1</sup>   |
| porous carbon fiber@VN [Ref. 4]       | -1.1 - 0            | 6 M KOH      | 245.0 F g <sup>-1</sup> at 0.5 A g <sup>-1</sup> |
| VN/Porous Carbon [Ref. 5]             | -1.15 - 0           | 2 M KOH      | 255.0 F g <sup>-1</sup> at 1 A g <sup>-1</sup>   |
| VN/N-doped graphene [Ref. 6]          | -1.2 - 0            | 6 M KOH      | 255 F g <sup>-1</sup> at 10 mV s <sup>-1</sup>   |
| VN/porous carbon [Ref. 7]             | -1.15 - 0           | 2 M KOH      | 284.0 F g <sup>-1</sup> at 0.5 A g <sup>-1</sup> |
| N-doped carbon nanosheets/VN [Ref. 8] | -1.15 - 0           | 2 M KOH      | 280.0 F g <sup>-1</sup> at 1 A g <sup>-1</sup>   |
| VN/N-doped graphene [Ref. 9]          | -1.2 - 0            | 6 M KOH      | 445.0 F g <sup>-1</sup> at 1 A g <sup>-1</sup>   |
| VN/carbon fibre [Ref. 10]             | -1.2 - 0            | 6 M KOH      | 530 F g <sup>-1</sup> at 1 A g <sup>-1</sup>     |
| this work                             | -1.0 - 0.2          | 2 M KOH      | 342.1 F g <sup>-1</sup> at 0.5 A g <sup>-1</sup> |

## References

- [Ref. 1] M. Hu and B. X. Mi, *Environ. Sci. Technol.*, 2013, **47**, 3715-3723.
- [Ref. 2] X. H. Li, S. Kurasch, U. Kaiser and M. Antonietti, *Angewandte Chemie-International Edition*, 2012, **51**, 9689-9692.
- [Ref. 3] Y. Liu, L. Y. Liu, Y. T. Tan, L. B. Kong, L. Kang and F. Ran, *J. Phys. Chem. C*, 2018, **122**, 143-149.
- [Ref. 4] F. Ran, Y. G. Wu, M. H. Jiang, Y. T. Tan, Y. Liu, L. B. Kong, L. Kang and S. W. Chen, *Dalton Trans.*, 2018, **47**, 4128-4138.
- [Ref. 5] Y. L. Yang, K. W. Shen, Y. Liu, Y. T. Tan, X. N. Zhao, J. Y. Wu, X. Q. Niu and F. Ran, *Nano-Micro Letters*, 2017, **9**, UNSP 6.
- [Ref. 6] H. H. Liu, H. L. Zhang, H. B. Xu, T. P. Lou, Z. T. Sui and Y. Zhang, *Nanoscale*, 2018, **10**, 5246-5253.
- [Ref. 7] F. Ran, Z. Wang, Y. L. Yang, Z. Liu, L. B. Kong and L. Kang, *Electrochim. Acta*, 2017, **258**, 405-413.
- [Ref. 8] Y. T. Tan, Y. Liu, Z. H. Tang, Z. Wang, L. B. Kong, L. Kang, Z. Liu and F. Ran, *Sci Rep*, 2018, **8**, 2915.
- [Ref. 9] J. Balamurugan, G. Karthikeyan, T. D. Thanh, N. H. Kim and J. H. Lee, *Journal of Power Sources*, 2016, **308**, 149-157.
- [Ref. 10] G. H. An, D. Y. Lee and H. J. Ahn, *Journal of Materials Chemistry A*, 2017, **5**, 19714-19720.
